# Supplementary material for: A novel mechanism of phenotypic heterogeneity in Creutzfeldt-Jakob disease
Source: PubMed Central journal article supplement (PMC7304206; doi:10.1186/s40478-020-00966-x), 2020-06-19

**Figure S3**

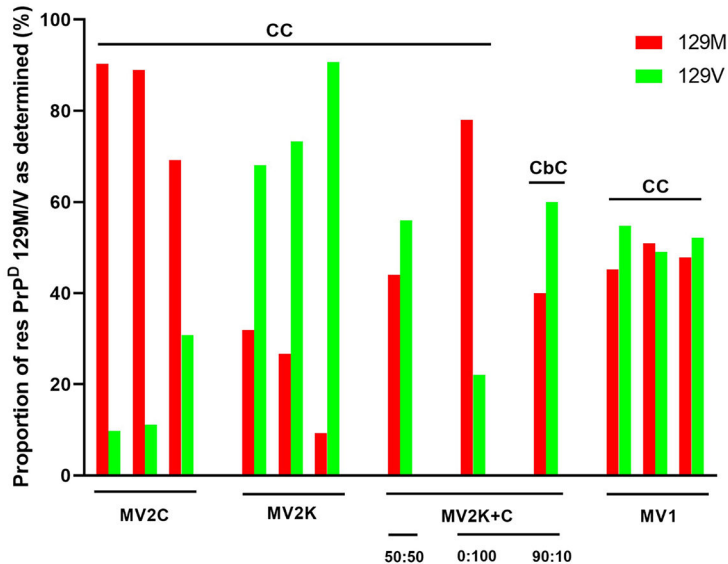

Supplement: 40478_2020_966_MOESM5_ESM.pdf [file 40478_2020_966_MOESM5_ESM.pdf]
