# Supplementary material for: A novel mechanism of phenotypic heterogeneity in Creutzfeldt-Jakob disease
Source: Springer Nature journal article supplement (doi:10.1186/s40478-020-00966-x), 2020-06-19

**Figure S1**

**a**

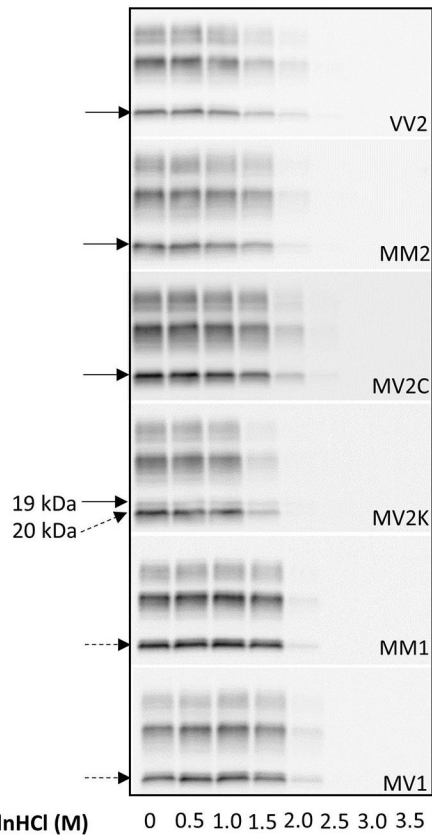

**b**

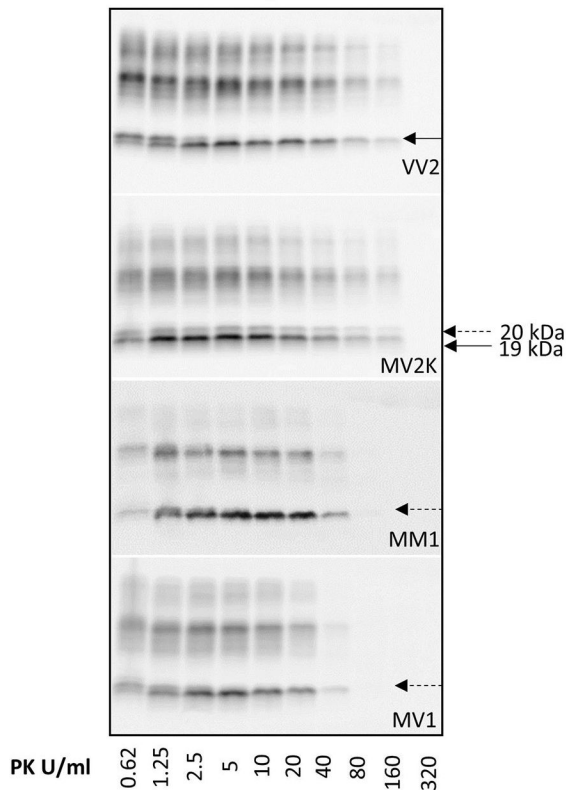

Supplement: MOESM3 [file 25667214]
